# Supplementary material
Source: publisher figshare collection journal article supplement (https://tandf.figshare.com/ndownloader/files/19922852)
Supplement: Supplementary file 1 [file 19922852]

SUPPORTING INFORMATION

FOR

**Modelling of Ca<sup>2+</sup>-promoted structural effects in wild type and post-translationally modified Connexin26**

Paolo Calligari, Mauro Torsello, Marco Bortoli, Laura Orian, Antonino Polimeno

*Dipartimento di Scienze Chimiche, Università degli Studi di Padova, Padova (Italy)*

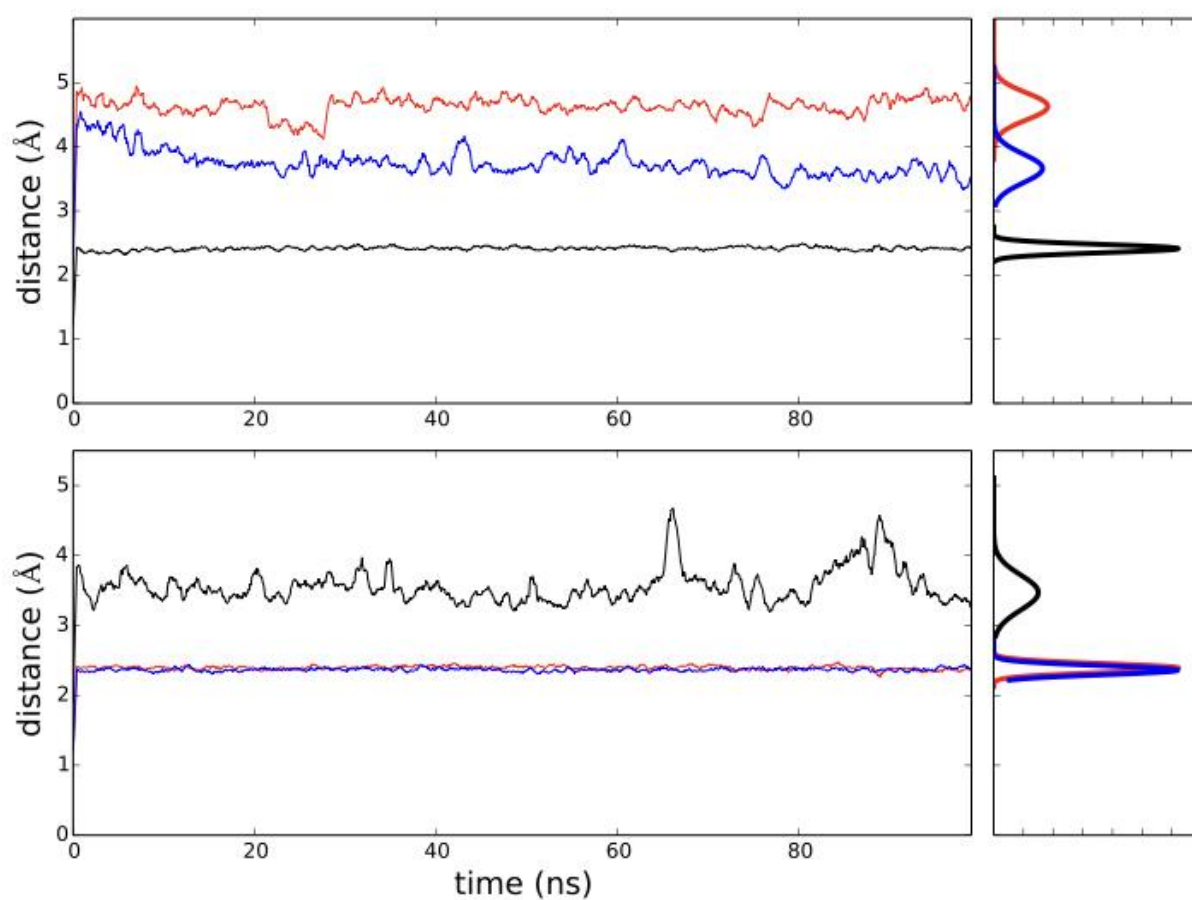

**Figure S1 :** Time evolution of minimum distances shown in Figure 7 for Cx26WT. Minimum distances between both calcium ions and their nearest residues are shown : E42, E47, R75 are shown in black, red, blue, respectively.

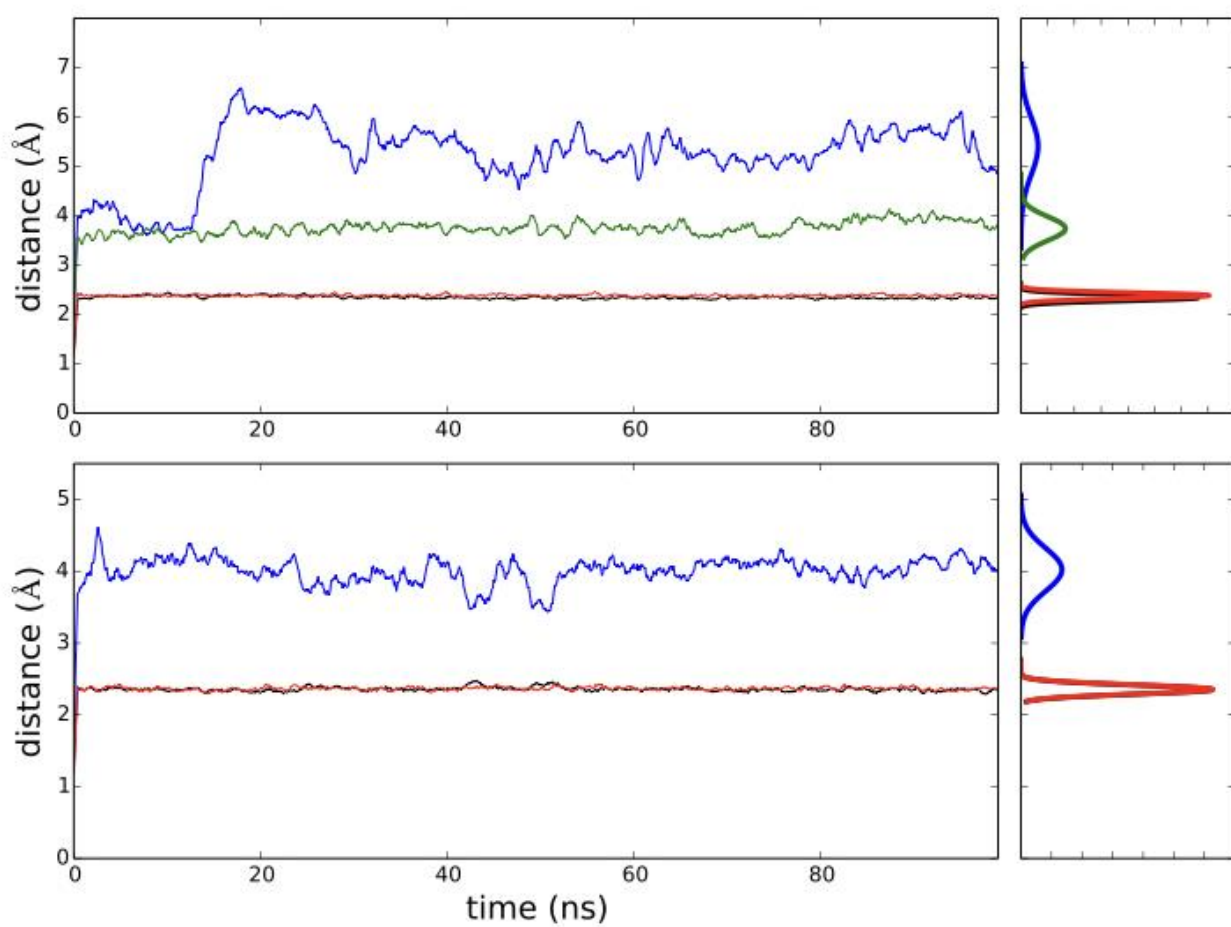

**Figure S2** : Time evolution of minimum distances shown in Figure 7 for Cx26E42-47γ. Minimum distances between both calcium ions and their nearest residues are shown : γE42, γE47, R75, D46A are shown in black, red, blue, green, respectively.

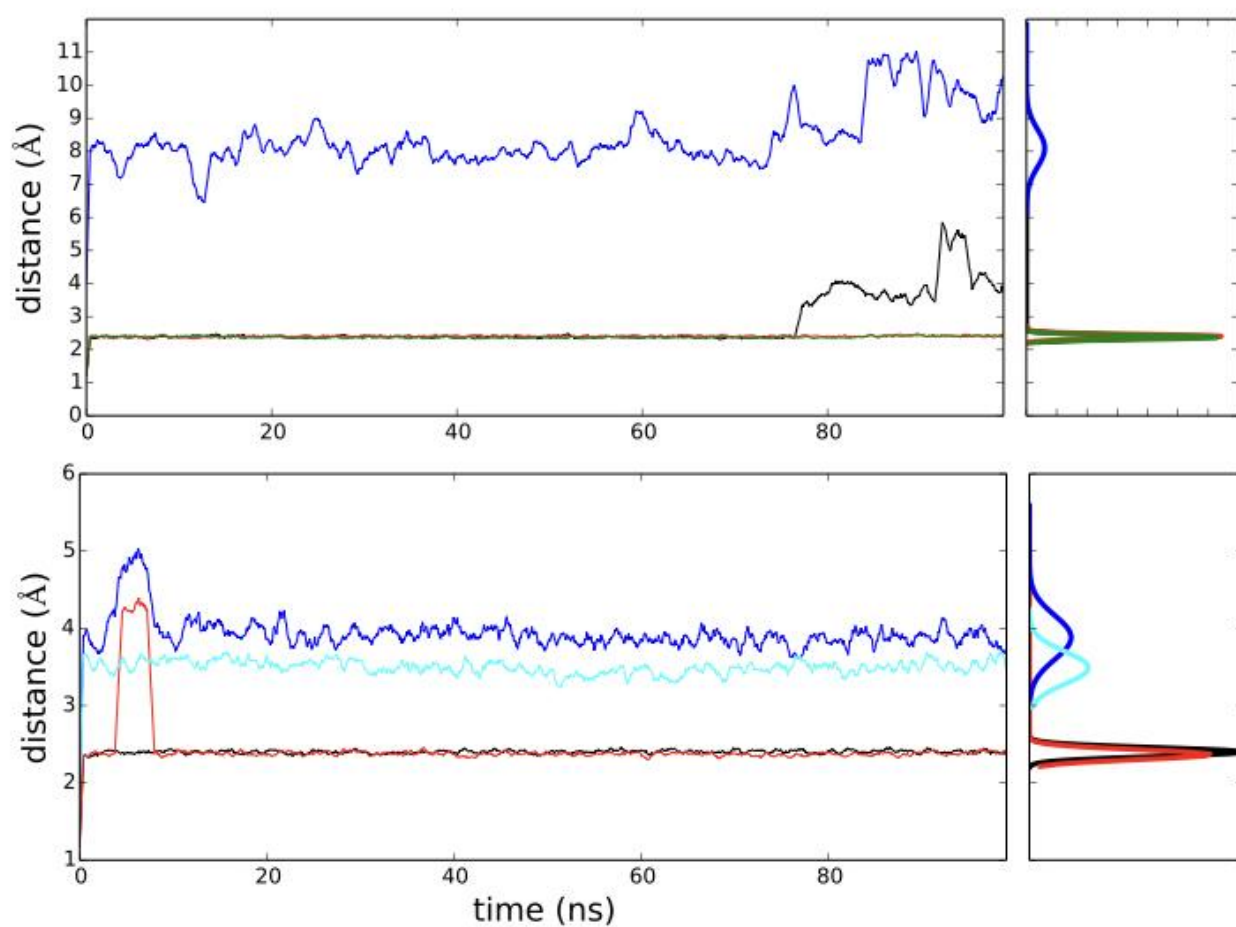

**Figure S3:** Time evolution of minimum distances shown in Figure 7 for Cx26R75m. Minimum distances between both calcium ions and their nearest residues are shown : E42, E47, R75, D46B are shown in black, red, blue and cyan, respectively.

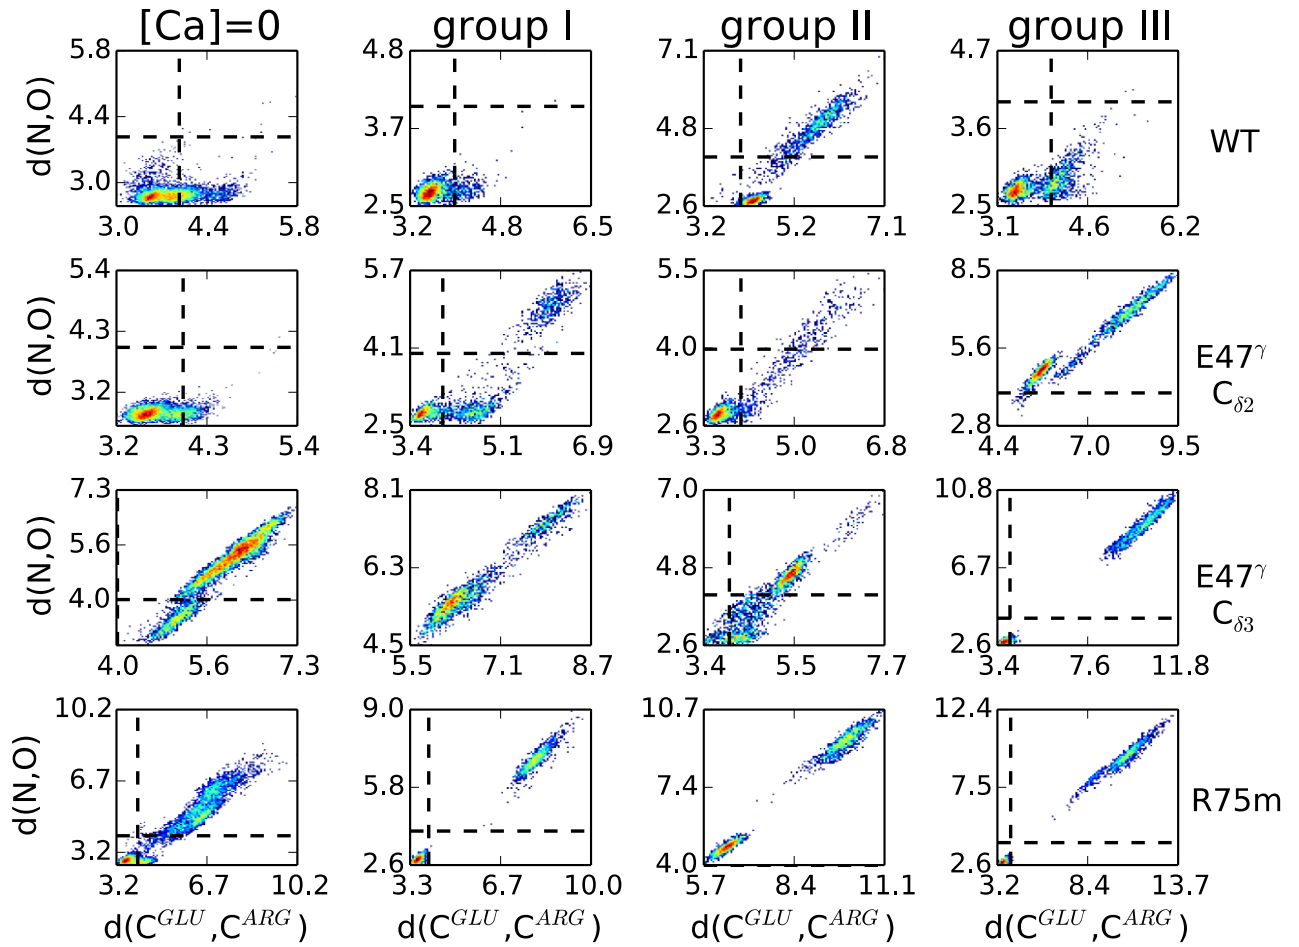

**Figure S4:** Ion-pair interaction between E47A and R75A in Cx26WT (first line), Cx26E42-47 $\gamma$  (second and third line) and Cx26R75m (forth line). Dashed lines define the boundaries of the different types of interactions ( $d(N,O) = 4.0$  and  $d(C^{GLU}, C^{ARG}) = 4.0$ ). Results from Cx26 in absence of calcium are shown in the left column. Results from Cx26 in presence of calcium ions are cast in three different groups: domains that do not directly interact with calcium ions in Ca<sup>2+</sup> bound protein (group I); domains whose E42 interacts with calcium ions (group II); protomes whose E47 and R75 are involved in the coordination of with a Ca<sup>2+</sup> ion (group III).

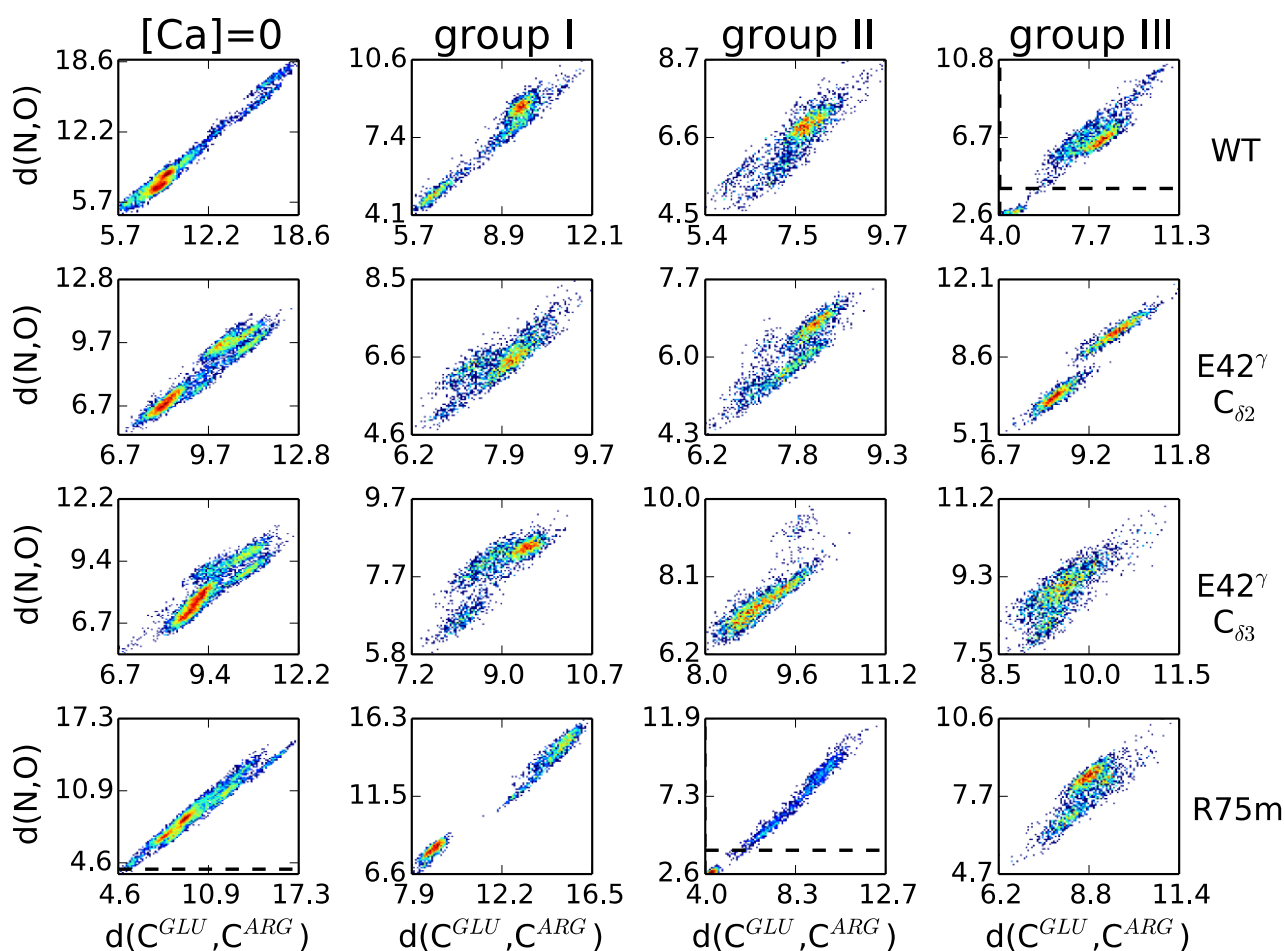

**Figure S5:** Ion-pair interaction between E42A and R184A in Cx26WT (first line), Cx26E42- 47 $\gamma$  (second and third line) and Cx26R75m (forth line). See Figure S4 for legend.

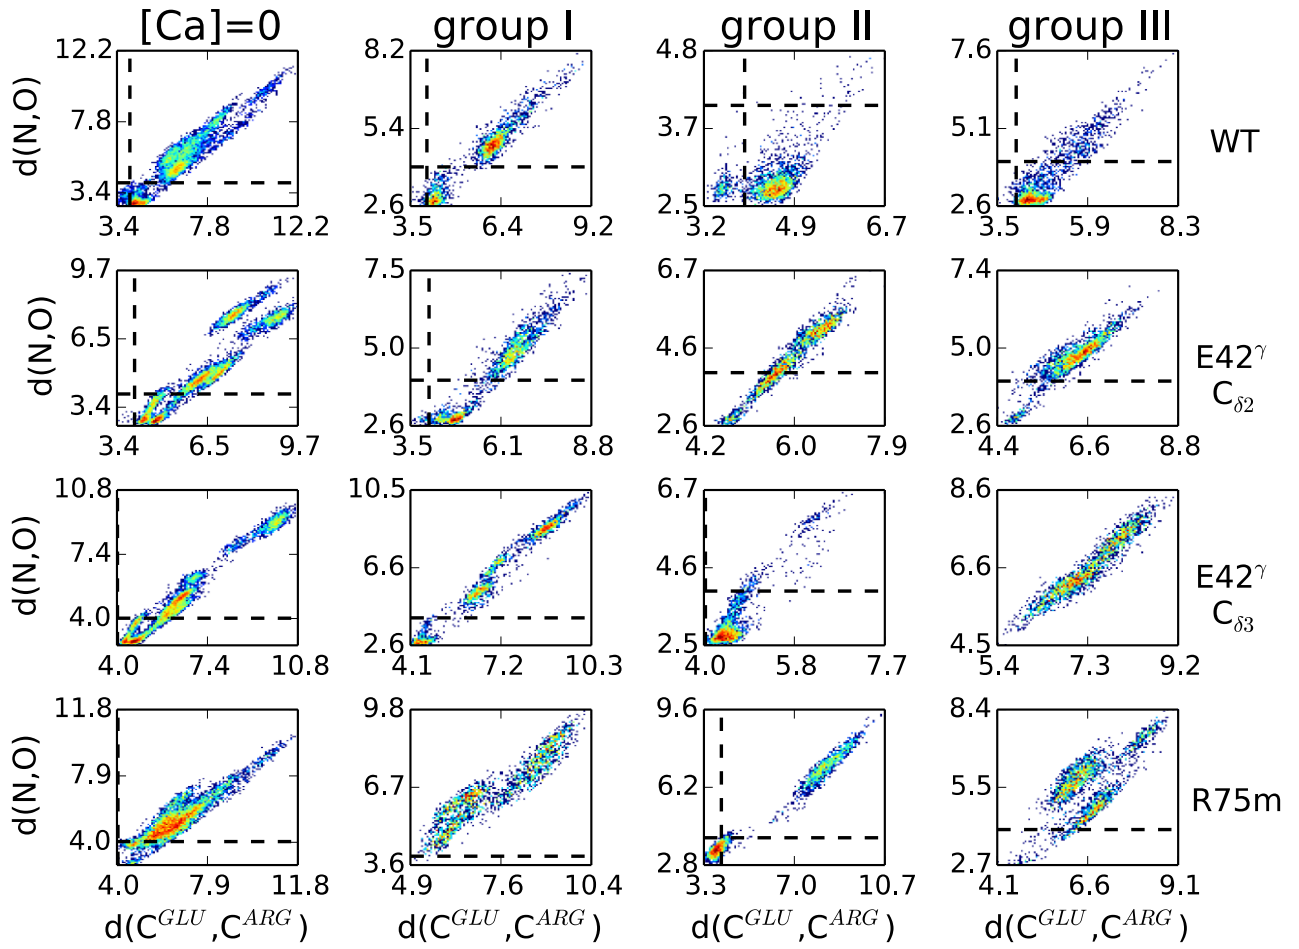

**Figure S6:** Ion-pair interaction between E42A and R75B in Cx26WT (first line), Cx26E42- 47 $\gamma$  (second and third line) and Cx26R75m (forth line). See Figure S4 for legend.

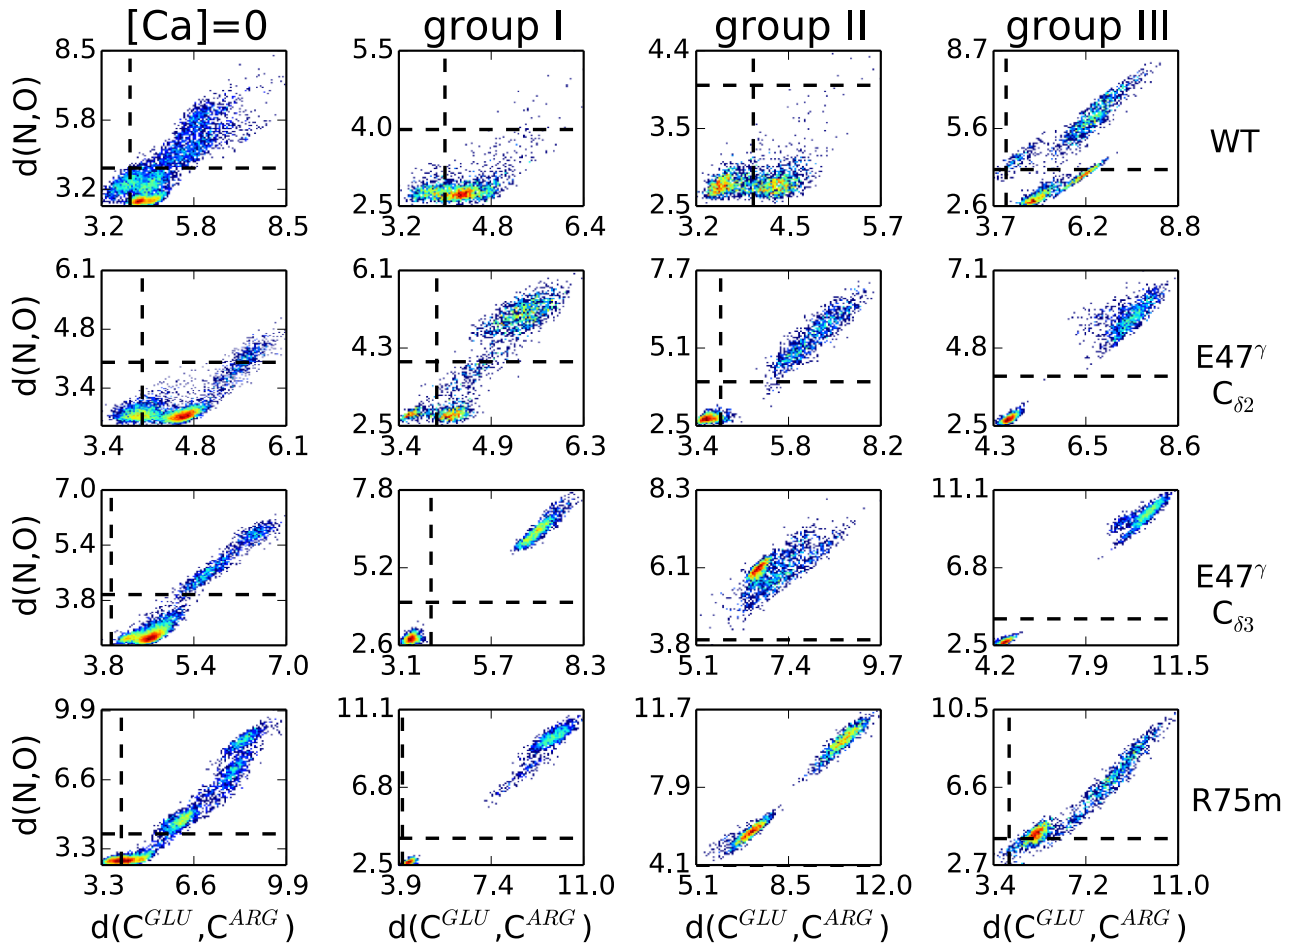

**Figure S7:** Ion-pair interaction between E47B and R184A in Cx26WT (first line), Cx26E42- 47 $\gamma$  (second and third line) and Cx26R75m (forth line). See Figure S4 for legend.
